# Supplementary material for: The temporal expression patterns of brain transcriptome during chicken development and ageing
Source: BMC Genomics. 2018 Dec 13;19:917. doi: 10.1186/s12864-018-5301-x (PMC6293534; doi:10.1186/s12864-018-5301-x)
Supplement: Supplementary file 5 — Functional categories of co-expressed genes in the top 2 modules. (XLSX 41 kb) [file 12864_2018_5301_MOESM5_ESM.xlsx]

## Sheet: top 2 mRNA-GO and KEGG
Additional file 5. Functional categories of co-expressed genes in the top 2 modules
Category	Term ID	Term discription	Count	Fold Enrichment	P-value	Genes
GO-MF	GO:0044822	poly(A) RNA binding	335	1.45454	2.92473e-19	GNB2L1,SUPT6H,HNRNPM,RPL36,SRSF3,CCDC47,DDX42,SNRNP40,UTP4,NIP7,NUCKS1,RPL22,DHX38,HNRNPR,NSUN5,,EFTUD2,HSPA5,ELAC2,RCC1L,CLK3,UTP11,SF3A3,MRPL20,RPL23,RPL19,MAK16,HSPB1,MDH2,SNIP1,WDR33,TAF15,SRP68,NCBP1,TRMT2A,CSDE1,THRAP3,RPS17,NPM1,NOC2L,AGO1,ETF1,CNOT1,GOT2,PUS1,HSPA9,CTNNA1,SFPQ,RAN,U2SURP,RPL10A,YWHAE,TFAM,SLC16A3,RPL27,RPL26L1,PRPF8,UTP18,EXOSC10,PARN,DDX49,ZC3H7A,RPL7A,BAG4,PTRF,KHDRBS1,…
GO-CC	GO:0005730	nucleolus	220	1.44918	2.00054e-12	RPL9,RPL36,ZNF593,ZCCHC17,NIP7,RBBP5,ZFHX3,NSUN5,CHAF1A,UTP11,RPL23,RPL19,MAK16,MED1,CDK12,JMJD6,CTCF,PRKRIP1,PHTF1,ELP1,APTX,WDR33,NPM1,NOC2L,REXO5,EXOSC3,RAN,RPL10A,,PEX14,EXOSC10,SMG6,RPL7A,SUZ12,PRRX1,NOP16,BRIX1,ZNF207,DDX5,SKP2,DNTTIP1,UBLCP1,TOP1,ARL6IP4,FANCD2,TOP2A,RNF111,MRM2,PPP1CC,RPS14,CENPP,,LEO1,GEMIN4,DHX40,BCAS3,AATF,ACACA,NFIB,VEZF1,TFIP11,NF1,TNFAIP1,2-Sep,SMARCB1,PHF6,RPS13,CO…
GO-CC	GO:0016020	membrane	324	1.32843	2.84668e-11	RPL9,MTCH1,DPYSL2,PSMF1,HNRNPM,RPL36,CCDC47,DDX42,WWP2,ELAVL1,DHX38,EFTUD2,HSPA5,RC3H2,CLK3,CSNK1A1,CYB5D2,,DDX20,CNTRL,B3GAT1,RPL23,GLT8D1,RPL19,MED1,ADPGK,ORAI2,RARS,SDF4,OPN4,AARS,RASL10B,CSF3R,RPS17,NPM1,CNOT1,NCDN,GUSB,RET,RAN,RPL10A,YWHAE,NBR1,RPL27,RPL26L1,PSME3,PRPF8,CDK1,EXOSC10,RPL7A,GNA11,KHDRBS1,DDX55,GBGT1,PLEKHA2,KPNA6,AIMP2,NUF2,TUBGCP2,DDX5,KPNA2,NUP155,MYO9B,NECAP2,CYFIP2,ARPC3,G…
KEGG_PATHWAY	gga03040	Spliceosome	68	1.65829	1.79518e-07	SNRPE,HNRNPM,LSM7,SRSF3,DDX42,SNRNP40,DHX38,EFTUD2,SF3A3,,NCBP1,U2SURP,SNRPC,PRPF8,DDX5,CHERP,SRSF10,BUD31,PPIH,CCDC12,SRSF1,PRPF6,RBM17,DDX46,RBMX,HSPA8,TRA2B,SNRPD3,NCBP2,SNRPA1,ALYREF,TCERG1,SF3A1,CRNKL1,THOC2,SMNDC1,LSM8,HNRNPA3,PLRG1,RBM25,SRSF5,AQR,LSM6,SNW1,PRPF38A,HNRNPU,MAGOH,SNRPF,HSPA2,SNU13,PHF5A,SF3B4,SNRNP27,DHX15,THOC1,CDC40,U2AF1,SF3B6,CDC5L,CWC15,SF3A2,SNRPB2,PRPF3,SNRPG
GO-CC	GO:0022627	cytosolic small ribosomal subunit	25	2.31728	3.5634e-07	RPS23,RPS11,RPS21,RPS7,RPS28,RPS13,RPS24,MCTS1,RPS10,MRPS18A,RPS3A,RPS25,RPS20,RPS2,RPS15,RPS12,RPS14,RPS17,EIF2D,EIF2A,RPS16,RPS3,RPS6,RPS4X,RPS8
GO-CC	GO:0005654	nucleoplasm	429	1.19464	7.75483e-07	TIMM17A,CD79B,PKP1,SPPL2B,DCAF7,STRADA,RANBP3,DDX42,CDC27,SNRNP40,ZBTB48,ACOT7,ELAVL1,EYA3,PTAFR,DNAJC8,DHODH,HNRNPR,DOT1L,TERF2IP,MAPKAP1,,ELAC2,NEK6,ETS1,SAMHD1,RC3H2,NUMA1,CLK3,ATP5PB,TNNC1,SF3A3,CCNL2,AURKAIP1,MTF1,SCAMP2,SFMBT1,JMJD6,IWS1,CTCF,RARS,DTX2,MDH2,APTX,TRIM33,SNIP1,NDUFB6,TAF15,FZR1,NCBP1,PARG,NPM1,NEK7,NOC2L,ADPRHL2,CLSPN,UQCRC2,RAN,U2SURP,HDAC3,MYO1C,ANKS1A,BRCA1,MTA1,TARDBP,PSM…
GO-MF	GO:0003735	structural constituent of ribosome	80	1.53393	2.16802e-06	RPL9,RPL36,RPL22,RPL38,MRPL20,RPL23,RPL19,RPS17,MRPS17,SLC25A33,RPL10A,RPS10,RPL27,RPL26L1,MRPL22,SLC25A14,SLC25A16,RPS14,RPL6,RPS4X,RPS24,,RPS21,RPS2,RPL5,RPL27A,RPS13,RPL13,MRPS11,MRPL46,SLC25A28,RPL4,MRPS7,SLC25A19,MRPS25,MRPS5,MRPL2,SLC25A5,SLC25A43,RPL12,RPL22L1,SLC25A12,SLC25A13,MRPS10,RPS3A,SLC25A21,RPS8,MRPS18A,SLC25A4,SLC25A29,SLC25A47,RPL15,RPL37A,SLC25A3,RPL7L1,RPL3,RPS12,RPS20,MRPL51,…
GO-CC	GO:0005737	cytoplasm	855	1.11846	2.28976e-06	PANX2,UBE2T,AFMID,GNB2L1,BRD2,DPYSL2,CD79B,COPS2,CMTM3,HINT1Z,LRRTM4,DCAF7,STK38,MAP3K3,DBNDD1,STRADA,DDX42,CDC27,SNRNP40,HAS3,ZBTB48,NIP7,CITED4,PAK1,MAP3K14,WWP2,NUCKS1,ZFHX3,ARNT,EYA3,DHX38,DNAJC8,DHODH,OAZ1,PHLPP2,NUDC,TERF2IP,KARS,MAPKAP1,EFTUD2,SCAI,ANKHD1,NEK6,ETS1,NDEL1,POLR2C,SKI,RC3H2,MAP2K2,PDCL,EPB41,CSNK1A1,IRF6,DAB2IP,UBE2G1,SSU72,UTP11,TBCD,PTTG1,CNTRL,PHF20,CLDN5,SIN3A,SEPT2L,DGKD…
GO-CC	GO:0070062	extracellular exosome	636	1.13995	4.11982e-06	KPNA4,RASSF9,FAM171A1,BSG,TPI1,ENO2,ACTN2,AHSA1,CANT1,GLRX3,RBP5,FAT4,COPS4,UBE2V2,WWP2,HNRNPA2B1,WARS,PCBD1,GNA11,AK4,CUL4B,RPL31,DMA,CETP,APAF1,CTDSP1,ST14,TMED10,CDC42BPB,SLC26A2,GNB1,PKP1,ETFA,HSPB1,CPM,BROX,CDC42BPA,ASXL1,HSPA8,CTH,DYNC1H1,PSMD14,GLIPR2,TSG101,RAB9A,CTBS,MBLAC2,PGRMC1,TIA1,SFN,TXNDC16,UBL3,ACTB,DNAJA1,IGSF11,OSBPL1A,TXNDC17,UBXN6,CNTN1,HSPA5,NTPCR,NRAS,FKBP4,NEGR1,MME,ASH1L,…
GO-CC	GO:0071013	catalytic step 2 spliceosome	41	1.80355	4.74068e-06	SNRPE,HNRNPM,LSM7,SNRNP40,DHX38,HNRNPR,EFTUD2,SF3A3,PRPF8,DDX5,ZCCHC8,GPATCH1,TFIP11,PRPF6,RBMX,SNRPD3,SNRPA1,SF3A1,PPIL3,CRNKL1,CWC22,HNRNPA3,PLRG1,AQR,SNW1,NRDE2,MAGOH,HNRNPA2B1,,CWC27,PPWD1,CDC40,SYNCRIP,SF3B6,CDC5L,CWC15,SF3A2,CACTIN,SNRPB2,SNRPG
GO-CC	GO:0005813	centrosome	125	1.37466	6.8071e-06	PKN2,CCDC141,WDR81,KIF2A,PPP1R12A,USP33,SKI,GNAI1,NFE2L2,ATP6V1D,CEP70,TUBGCP3,PCM1,DCAF12,IQCB1,CCDC77,DCTN3,SLC1A4,IFT80,TTC28,CCT4,LOC100857269,GEN1,BRCA2,DIS3L,DYNC1I2,DYNC1H1,LEO1,TTLL5,CEP95,VPS4B,EYA3,DCTN5,CEP350,DCTN6,WDR35,CDC16,NUP107,IFT140,BCL2L1,TSEN2,PCGF5,DTL,CENPF,RFWD2,PDE4D,DYNC1LI1,CIB1,KIF13A,CEP63,IST1,CDC14A,CEP55,HARBI1,HAUS6,WRAP73,PSEN2,CAMSAP2,CSNK1A1,CDK6,AHI1,RAB11A,R…
GO-MF	GO:0003723	RNA binding	102	1.38828	3.21451e-05	SNRPE,RPL9,LSM7,DDX42,ELAVL1,EIF2D,PUS3,ANKHD1,SAMHD1,RPL38,SF3A3,ACO1,NPM1,EXOSC3,SMN,RPL10A,TARDBP,PARN,RPL7A,KHDRBS1,SUZ12,TARS,DDX55,BRIX1,ZMAT4,BARD1,SMARCE1,TARSL2,DDX21,,SETD1B,CPSF4,MRM3,YBX1,DKC1,FARSB,SRSF1,EIF4G2,YTHDF1,FAM103A1,EARS2,RPL13,RBM17,HTATSF1,RBMX,SNRPD3,PUS10,SF3A1,EWSR1,RBM19,MCTS1,NSUN6,RBM20,PDCD4,C1D,FXR1,FUBP1,CWC22,TRUB1,PNO1,LSM8,TIA1,ZCRB1,EPRS,NOVA1,LRPPRC,LSM6,PS…
KEGG_PATHWAY	gga03010	Ribosome	68	1.47559	5.76207e-05	RPL9,RPL36,RPL22,RPL38,MRPL20,RPL23,RPL19,RPS17,MRPS17,RPL10A,RPS10,RPL27,RPL26L1,RPL7A,MRPL22,MRPL21,RPS14,RPL6,RPS4X,RPS24,,RPS21,RPS2,RPL5,RPL27A,RPS13,RPL13,RPS15A,MRPS11,RPL35A,RPS25,RPL4,MRPS7,MRPS5,MRPL2,RPL12,RPL22L1,MRPS10,RPS3A,RPS8,MRPS18A,RPL15,RPL37A,MRPL18,RPL3,RPS12,MRPL10,RPS20,RPL37,RPS6,RPS15,RPL24,RPS23,RPL8,RPS7,RPL31,MRPS9,RPS11,RPS3,MRPL35,MRPS18C,RPLP0,RPS28,MRPS2,RPS16,RPL…
KEGG_PATHWAY	gga03013	RNA transport	73	1.42689	0.000128666	ELAC2,DDX20,NCBP1,SMN,RAN,NUP93,EIF4EBP1,EIF3I,NUP155,CYFIP2,GEMIN5,GEMIN4,,NUP210,TPR,EIF4G2,EEF1A2,NCBP2,POP5,ALYREF,RAE1,EIF4E2,SUMO2,NUP85,NXT2,EIF3J,SEC13,SUMO1,THOC2,EIF4G1,UPF3B,EIF4A2,RPP38,FXR1,FMR1,NMD3,XPOT,NUP107,EIF4G3,EIF2B3,PNN,EIF2B2,XPO5,MAGOH,NUP133,EIF5,NUP54,RANGAP1,NUP43,EIF3D,NUP153,NUP37,GEMIN6,SEH1L,NUP50,PHAX,PAIP1,THOC1,TGS1,TACC3,EEF1A1,EIF2S3,EIF1AY,GEMIN8,EIF5B,NUP58,…
GO-CC	GO:0016607	nuclear speck	38	1.67158	0.000139237	SRSF3,EFTUD2,CSNK1A1,CCNL2,CDK12,HIPK1,THRAP3,ARL6IP4,SRSF10,NSRP1,,SETD1B,PPIH,MYO15A,SRSF1,TFIP11,FYTTD1,CWC22,RBM25,SRSF5,EPAS1,GLI2,EAF2,WTAP,HIF1A,WT1,BASP1,BCLAF1,CIR1,U2AF1,AKAP17A,CDC5L,WBP4,PSPC1,FAM206A,TCIM,PRPF3
GO-CC	GO:0000776	kinetochore	28	1.81675	0.000189615	NDEL1,SIN3A,ZNF207,MAD1L1,CENPI,,NUP85,SEC13,PSEN2,PSEN1,CENPF,NEK2,NUP107,PPP1R12A,GPATCH11,DYNC1LI1,CENPC,RANGAP1,MAD2L1,KIF18A,NUP43,NUP37,NDC80,DYNLT3,CENPO,WDR81,CENPT
GO-CC	GO:0031965	nuclear membrane	58	1.47579	0.000264049	CMTM3,ADRA1A,SCAI,TMEM57,ADRA1B,PHF20,DTX2,FZR1,SLC16A3,NUP93,TMEM38A,SHISA5,INTS2,BRIP1,TMEM97,DCTN5,BCL2L1,GTPBP4,CEP131,HACD3,JPT1,DNAJC2,SUMO1,MINDY3,OSBPL6,PLRG1,LBR,GRK5,NUP107,AKAP6,IPO13,OSBPL8,SPAST,PRPF38A,AHCTF1,OSBPL3,NUP133,SCRN1,WTAP,,RANGAP1,CEP70,GCH1,KLHDC2,CDC14B,NUP153,PCM1,C22H2ORF42,TSPO,NUP50,WDR3,AK9,RB1CC1,PUM2,FAM76B,PLCD4,TMEM18
GO-BP	GO:0000398	mRNA splicing, via spliceosome	34	1.67732	0.000294107	DDX46,LSM7,CWC22,DHX15,SNRPA1,LOC422214,U2AF1,HNRNPA2B1,CDC40,NOVA1,ZCRB1,AQR,BUD31,SNRPB2,SF3A3,SNRNP35,SNRPG,CWC15,SF3B6,DHX38,TRA2B,ZRSR2,NONO,HELB,HTATSF1,SNU13,LSM6,USP49,SNW1,LSM8,PRPF3,PLRG1,PSPC1,METTL14
KEGG_PATHWAY	gga04110	Cell cycle	62	1.44324	0.000300973	CDC27,RBL1,PTTG1,CDC45,FZR1,YWHAE,E2F1,CDK1,HDAC1,CCND3,SKP2,YWHAB,CCNB2,MAD1L1,ORC6,MAD2L2,CDC14A,WEE1,MCM2,CDC7,PLK1,SKP1,CCND1,CREBBP,ORC5,BUB1,,STAG2,SMC3,ANAPC2,CDK6,TGFB2,BUB3,MDM2,CDC20,CDKN2C,ORC1,CCNA2,MAD2L1,EP300,RBX1,ORC4,CDC14B,CDK7,GSK3B,HDAC2,CCNH,TTK,YWHAQ,MCM3,CDC16,CCNA1,YWHAG,CDKN1B,CCNB3,GADD45A,CDC26,SFN
GO-BP	GO:0006412	translation	69	1.40482	0.000418911	RPL22,EFTUD2,RPL38,MRPL20,RPL23,RPL19,RPS17,SLC25A33,RPL10A,RPL27,RPL7A,MRPL22,SLC25A14,SLC25A16,RPS14,RPS4X,RPS24,,RPS21,RPS2,RPL5,RPL27A,RPS13,RPL13,MRPS11,SLC25A28,RPL4,MRPS7,SLC25A19,MRPS5,SLC25A5,SLC25A43,RPL12,SLC25A12,SLC25A13,MRPS10,RPS3A,SLC25A21,RPS8,SLC25A4,SLC25A29,SLC25A47,RPL15,RPL37A,SLC25A3,RPL3,HBS1L,RPS12,SEPSECS,RPS20,MRPL51,RPL37,RPS6,RPS15,RPL24,RPS23,RPS7,EIF5B,MRPS9,SLC25A3…
GO-BP	GO:0006457	protein folding	46	1.51288	0.00059453	NUDC,PFDN1,TBCD,QSOX2,AARS,HSPA9,CCT6A,DNAJA2,PPIF,PPIH,PPIC,RIC3,DNAJB6,,CLPX,PFDN4,DNAJC1,PPIL3,CCT4,DNAJB4,MKKS,FKBP7,CLGN,PPIG,TCP1,TXN2,TXNDC5,CCT5,ERP44,TMX3,FKBP4,CWC27,PPWD1,TXN,CCT8,CCT7,PDIA6,FKBP1B,PDCL3,EPS15L1,DNAJA1,FKBP10,FKBP1C,TMX4
GO-BP	GO:0009411	response to UV	15	2.13776	0.00093303	TROVE2,UBE4B,MAD2L2,MAPK8,TIPIN,UBE2A,CASP7,MSH6,DTL,PRIMPOL,USP1,ZRANB3,PRKAA1,REV1,XPA
GO-CC	GO:0022625	cytosolic large ribosomal subunit	30	1.65661	0.00105831	RPL9,RPL36,ZCCHC17,RPL22,RPL38,RPL23,RPL19,RPL10A,RPL27,RPL26L1,RPL7A,RPL6,,RPL5,RPL27A,RPL13,RPL4,RPL12,RPL22L1,RPL15,RPL37A,RPL7L1,RPL3,RPL37,RPL24,RPL8,RPL31,RPLP0,RPL21,RPL32
GO-BP	GO:0006974	cellular response to DNA damage stimulus	37	1.55601	0.00116314	UBE2T,TLK2,RBBP5,FANCF,TOP2A,PITHD1,CCDC13,AATF,USP47,USP10,BCCIP,BCL6,TAOK3,MASTL,CCND1,NFATC2,FBXO18,CIB1,CUL4B,MCM8,ATF2,PSEN1,SETD7,DTL,HELB,PLK3,SHPRH,CLOCK,SGK1,MCM9,POLQ,CHD1L,USP16,HERC2,SPDYA,TIGAR,BTG2
GO-CC	GO:0005829	cytosol	316	1.14225	0.00135156	UCHL1,KPNA4,RASSF9,UBE2G2,TPI1,BPGM,PRDX4,ENO2,OSTM1,NBEA,SNX3,LPIN2,EEF1A1,DNAJC2,SPG11,COPS4,RPS3A,NFE2L2,RAPGEF2,TMSB4X,ASNS,MAD2L1,ANXA2,KPNA5,SGTA,PLCH1,CYCS,PRMT8,GEMIN8,GMPS,FGF2,CNDP1,PGP,SRI,CAPZA1,ARFRP1,DVL1,VSNL1,HSPA8,SCGN,SNX5,RAB9A,ARF1,BAG4,PEX7,DTYMK,VTI1B,ARFGAP3,YARS2,ARL6,ACTB,DNAJA1,RANBP3,TXNDC17,ADK,FAHD1,GCH1,PDCD11,RGS10,FGF13,RASGRF1,BCL2L1,LDHA,HSPA5,PDZD11,CTNNA2,VAMP3…
GO-CC	GO:0043209	myelin sheath	61	1.38874	0.00145465	DPYSL2,NEFL,HSPA5,GNB1,ATP5PB,MDH2,GOT2,HSPA9,UQCRC2,TSPAN2,PACSIN1,PHGDH,NDUFA10,CDC42,DNM1,SYN2,VDAC2,TKT,UQCRC1,2-Sep,EEF1A2,HSPA8,THY1,ATP5C1,PGAM1,DLAT,DLD,NDUFS3,ACTR1A,HSPD1,GDI2,NAPB,NDUFS1,SLC25A5,GNB4,SNAP25,EHD3,CNTN1,SLC25A12,ACTB,CCT2,PRDX1,SLC25A4,CKB,SLC25A3,TCP1,ACO2,CCT5,EZR,NAPG,UCHL1,ENO2,SERINC5,WDR1,TAGLN3,SOD1,EEF1A1,SUCLA2,FSCN1,UQCRFS1,ARF6
GO-CC	GO:0000777	condensed chromosome kinetochore	14	2.13735	0.00166843	CSNK1A1,CFDP1,NUF2,INCENP,AHCTF1,SPC25,ITGB3BP,CENPK,CENPH,NDC80,CHAMP1,CENPS,CENPW,CENPT
GO-BP	GO:0051301	cell division	42	1.47594	0.00208545	NUDC,CSNK1A1,CNTRL,MIS12,SEPT2L,SPDL1,KIF14,CDK1,NUF2,CCNB2,MAD2L2,SKA2,CDC14A,2-Sep,CEP63,SPECC1L,MAPRE1,MASTL,CCND1,TIPIN,GNAI1,MCMBP,ITGB3BP,USP37,FGF2,CCNA2,CDC14B,MAEA,CDC123,KIF2A,NDC80,SMC2,USP16,LIG4,PDS5B,CENPJ,ARPP19,LZTS2,CENPS,CCNB3,CENPW,CENPT
GO-BP	GO:0000910	cytokinesis	17	1.8961	0.00287682	IST1,RHOC,,BECN1,RAB11FIP4,KLHL9,BCL2L1,RAB35,CIT,INCENP,RAB11A,AHCTF1,KIF13A,PRC1,BRCA2,DCTN3
GO-CC	GO:0071011	precatalytic spliceosome	13	2.10873	0.00336584	SNU13,SNRNP27,CRNKL1,SNRNP35,SNRPD3,PLRG1,SF3B6,SNRPG,SNRNP40,PRPF38A,SNRPE,AGGF1,PRPF38B
GO-BP	GO:0006606	protein import into nucleus	22	1.71021	0.00353842	KPNA3,KPNA4,NUP93,CSE1L,NUP153,NUP155,NUP50,RANBP1,KPNA6,RAN,IPO13,IPO8,NUP107,NUP58,IPO7,FGF9,NUP133,FAM53A,NUP85,KPNA2,NUP62,CRY2
GO-CC	GO:0005739	mitochondrion	267	1.13786	0.00414185	GNB2L1,MTCH1,DPYSL2,STARD4,URAH,RAB11B,KARS,MTFR1L,ELAC2,C20H20ORF24,RCC1L,MYH10,CLIC4,BSG,MRRF,STOM,TNNC1,AURKAIP1,SLC16A1,ACSBG2,RARS,HSPB1,COMT,NCBP1,ACO1,MRPL38,LIG3,ADPRHL2,GOT2,PUS1,HSPA9,GBAS,SELENOU,CRYM,CHCHD2,YWHAE,PDPR,KIF1B,NBR1,RILP,BRI3BP,NME2,SPHKAP,PRELID1,PLPBP,ERBB4,PTRF,RAI14,UBIAD1,RAB8B,LACTB,MMP2,AZIN2,ATAD1,THG1L,DNA2,MINOS1,HMGCL,KIF1BP,SUPV3L1,HK1,MRM2,P4HA1,IQCE,,C11H19o…
GO-CC	GO:0030496	midbody	35	1.48914	0.00462274	PKN2,KLHL13,MAK,RACK1,KIF14,CHMP4B,GNAI1,C26H6ORF89,CLIC4,SEPT2L,HSPA5,NEK2,ANXA2,DDX11,CENPF,SPAST,ZNF330,VPS37B,TTC28,CDC42,LOC100857269,CENPE,RAN,ERH,SCCPDH,KIF13A,ECT2,INCENP,BIRC6,MYH10,CEP55,CDK1,KIF23,PTCH1,RAB11FIP4
GO-BP	GO:0048813	dendrite morphogenesis	17	1.8171	0.00552404	VLDLR,FYN,DSCAM,DCX,KLF7,BTBD3,RERE,ELAVL4,KIDINS220,DVL1,FARP1,SLITRK5,MAP6,RAC1,CTNNA2,MAP2,ITGB1
GO-BP	GO:0010971	positive regulation of G2/M transition of mitotic cell cycle	8	2.56532	0.00717483	CCND1,APP,RAD51B,VPS4B,RAB11A,CDC7,PBX1,SIN3A
KEGG_PATHWAY	gga04910	Insulin signaling pathway	59	1.31369	0.00776718	PRKAR1B,CRK,PRKAA1,INPPL1,MAP2K2,SH2B2,PYGL,GSK3B,PIK3CA,PIK3CG,PIK3R2,PRKAR1A,SOCS1,PRKCI,MAPK1,PDPK1,MAPK8,EIF4E2,MTOR,BRAF,MAP2K1,HKDC1,ACACA,CALM1,PRKCZ,SREBF1,TSC2,PRKAA2,EIF4EBP1,PRKAR2B,RHOQ,PHKA2,PYGB,TSC1,FOXO1,SOCS3,SHC4,RAPGEF1,RPS6,PTPRF,NRAS,IRS4,CBL,PHKA1,PPP1R3C,GRB2,PIK3R3,PIK3R5,MKNK2,PTPN1,MAPK10,PPP1CC,HK1,ACACB,SHC2,SOS2,PIK3CD,AKT1,SOCS2
GO-CC	GO:0005874	microtubule	52	1.33622	0.00922241	NUDC,WDR81,KIF2A,HOOK1,DPYSL2,TUBGCP2,KIF5C,MAP2,TUBA4B,CCT4,TBCD,NDEL1,INCENP,DYNC1I2,ODF2,KIF3A,DYNC1H1,MID2,MDM1,MAPRE1,TUBB1,CCT7,KIF9,DLG1,MAP1B,CLRN1,TUBGCP4,KIF14,TCP1,CCT2,CCT5,FGF13,TUBB2B,MAP6,TUBB3,NUSAP1,MAP7,KIF4A,SARM1,SPAST,TUBAL3,CCT8,DYNC1LI1,CENPE,CCDC50,LRPPRC,TPX2,KIF5B,MTA1,KIF23,TUBE1,GAS8
GO-BP	GO:0006511	ubiquitin-dependent protein catabolic process	43	1.37886	0.00936453	UCHL1,UFD1L,USP28,UBE2G2,USP16,USP37,RANBP1,USP5,NPLOC4,USP13,USP33,USP47,USP3,PSMA3,USP7,RNF20,ZNRF3,COPS3,SKP2,USP9X,DTL,PSMA6,PSMF1,FBXO8,PSMA1,XBP1,RNF8,CHFR,SKP1,UCHL5,USP38,UBE2G1,ADRM1,UBA6,USP1,USP14,USP40,USP49,PSMA4,UHRF2,TOLLIP,USP10,UBE2D1
GO-CC	GO:0005925	focal adhesion	116	1.19945	0.010109	RPL9,MRC2,RPL22,HSPA5,BSG,RPL38,RPL23,RPL19,HSPB1,SRP68,RPS17,NPM1,HSPA9,CTNNA1,TLN1,RPL10A,YWHAE,NCKAP1,RPL27,ATP6V0A2,RPL7A,,CCND3,RHOA,ARPC3,YWHAB,ADAM10,GNA12,COP1,PPP1CC,RPS14,CDC42,RPL6,VCL,PLAU,ARF1,AATF,PARVA,RPS2,FLNB,RRAS2,RPS13,FHL1,LAP3,HSPA8,CD81,PROCR,THY1,TGM2,RAC1,NRP1,ITGB1,PXN,HACD3,HYOU1,CTTN,RPL4,KIF23,GDI2,FES,PTK7,DDR1,VIM,ITGA8,ACTR2,RPL12,FERMT1,USP33,EHD3,NUMB,GRK5,ACTB,P…
GO-MF	GO:0000980	RNA polymerase II distal enhancer sequence-specific DNA binding	23	1.58993	0.0101279	CREB1,ATF2,HDAC1,NR5A2,H3F3B,HIVEP1,NR1H4,NONO,ACTB,BACH1,NFE2L2,REL,SFPQ,RBBP4,H2AFZ,CHD4,SMARCB1,SMARCE1,JUN,ACTL6A,T,PBX3,HDAC2
GO-BP	GO:0006260	DNA replication	30	1.47999	0.0101807	NFIB,RRM1,RFC3,RFC4,DNAJC2,SSBP1,CHAF1B,SSRP1,LIG4,RBBP4,RPA1,RBBP7,CHAF1A,TNFAIP1,RMI2,DTL,TOP2A,PIF1,MCM8,POLD3,GINS1,TICRR,MYST2,LIG3,RECQL5,DNA2,MCM9,RPA3,TOP1,SIN3A
GO-BP	GO:0045737	positive regulation of cyclin-dependent protein serine/threonine kinase activity	10	2.13776	0.0125466	CCND1,CCND3,CCNC,CCNH,SPDYA,CCNL2,PROX1,PDGFB,PSMD10,CCNT2
GO-BP	GO:0043044	ATP-dependent chromatin remodeling	10	2.13776	0.0125466	RBBP4,SMARCA1,CHD4,SMARCA5,SMARCB1,SMARCE1,HDAC1,ACTL6A,ACTB,HDAC2
GO-MF	GO:0000166	nucleotide binding	92	1.22056	0.0130452	NCBP3,TNRC6A,RRP7A,EWSR1,RBM25,POLDIP3,POLR2D,TRMT2A,ADCY7,POLA1,SRSF10,RBM45,ELAVL4,CELF3,SFPQ,SREK1,U2AF1,HNRNPA2B1,SRSF1,AKAP17A,RBM47,ADCY2,U2SURP,RBM19,ZCRB1,NIFK,ENOX2,SNRPB2,DAZAP1,MRPL39,SF3B6,CPEB3,RCAN1,SAFB,HNRNPA3,LARP7,HTATSF1,RBMX,RBM20,TAF15,TTL,PSPC1,RCAN3,UPF3B,ALYREF,NT5E,NT5C1A,ELAVL1,APLF,SYNCRIP,C2H6orf52,TIA1,RBM7,TIA1,NT5C3B,RPS24,ORC4,SLTM,SRSF5,LOC422214,SF3B4,CRY1,SRSF3,…
GO-MF	GO:0098641	cadherin binding involved in cell-cell adhesion	14	1.83879	0.013243	EPCAM,PRDX1,YWHAE,BZW1,BSG,SH3GL1,CCNB2,PTPN1,ARGLU1,VCL,RACK1,CHMP4B,YWHAB,MAPRE1
GO-MF	GO:0004702	receptor signaling protein serine/threonine kinase activity	25	1.52724	0.0133642	TGFBR2,PAK3,NRK,TGFB2,TAOK1,TAOK3,LOC420419,BMPR1B,MAP3K19,MAP2K2,PAK2,MAP2K1,MAP3K4,NEK1,MAP3K3,SLK,STK24,MAP2K6,PAK1,MAP4K4,BMPR2,MAP3K2,PAK7,MAP3K14,ACVR2B
GO-CC	GO:0005778	peroxisomal membrane	13	1.87442	0.0145421	ABCD3,TTC1,PEX10,GNPAT,AGPS,PNPLA8,ATAD1,PXMP4,PEX14,PEX5,FAR1,HMGCR,RAB8B
KEGG_PATHWAY	gga04914	Progesterone-mediated oocyte maturation	40	1.36565	0.0146073	ADCY9,CPEB1,IGF1,ANAPC4,SPDYA,MAPK12,CDC27,ADCY7,CDC26,GNAI1,PLK1,CDC16,CCNA1,ANAPC2,PIK3CA,MAD2L1,PIK3CG,ADCY2,PIK3R2,PIK3R3,PIK3R5,MAPK10,MAPK1,MAPK8,CPEB3,CPEB2,CCNB3,BRAF,CCNA2,MAP2K1,RPS6KA6,BUB1,MAD1L1,CCNB2,FZR1,CDK1,ANAPC1,MAD2L2,PIK3CD,AKT1
GO-CC	GO:0005832	chaperonin-containing T-complex	7	2.59535	0.0152889	CCT8,CCT6A,TCP1,CCT2,CCT4,CCT7,CCT5
GO-BP	GO:0000226	microtubule cytoskeleton organization	20	1.60332	0.0153215	NEFL,PRKCZ,TBCD,CAMSAP2,,SPECC1L,PCNT,ZPR1,MAP6,TTL,MARK1,PPP2R3C,MARK3,MAP7,SS18,PHLDB2,TACC3,MAP7D2,GAS2L3
GO-BP	GO:0006446	regulation of translational initiation	12	1.92399	0.0153644	EIF3A,EIF3L,NCBP1,EIF2B2,EIF3F,EIF5,EIF4A2,EIF3J,EIF3M,EIF5B,EIF3I,KLHL25
GO-BP	GO:0016050	vesicle organization	12	1.92399	0.0153644	SNX10,SNX12,FBXO5,SNX4,SNX6,CADPS,SNX1,SNX8,SNX3,SNX30,SNX7,SNX5
GO-BP	GO:0002181	cytoplasmic translation	12	1.92399	0.0153644	RPL26L1,RPL36,RPL8,RPL31,RPL7L1,EIF3J,RPL15,RPLP0,RPL22L1,RPL9,RPL22,RPL6
GO-BP	GO:0021762	substantia nigra development	18	1.64913	0.0161322	YWHAE,CDC42,ATP5J,YWHAQ,SUDS3,RHOA,FGF2,GNB4,ACTB,SYNGR3,MAPKAP1,ATP5F1,BASP1,FGF9,CKB,HSPA5,NDUFS3,TTBK1
GO-BP	GO:0043297	apical junction assembly	7	2.56532	0.016295	RHOC,PKN2,CTNNA1,VCL,RHOA,FBF1,CLDN19
GO-BP	GO:0035269	protein O-linked mannosylation	7	2.56532	0.016295	DPM1,LARGE,DPM2,GYLTL1B,TMEM5,POMGNT2,ALG5
GO-BP	GO:0048026	positive regulation of mRNA splicing, via spliceosome	7	2.56532	0.016295	CELF3,DAZAP1,SNW1,SF3B4,HSPA8,TRA2B,THRAP3
GO-BP	GO:1904851	positive regulation of establishment of protein localization to telomere	7	2.56532	0.016295	CCT8,TCP1,CCT2,CCT4,CCT7,CCT5,DKC1
GO-BP	GO:0000462	maturation of SSU-rRNA from tricistronic rRNA transcript (SSU-rRNA, 5.8S rRNA, LSU-rRNA)	14	1.79572	0.0164958	WDR3,MRPS11,UTP6,FCF1,RPS24,DIEXF,UTP18,RPS14,KRR1,UTP20,RPS16,MRPS9,TBL3,RPS8
GO-BP	GO:0032212	positive regulation of telomere maintenance via telomerase	14	1.79572	0.0164958	CCT8,CCT4,CCT7,HMBOX1,NEK7,MAP3K4,TCP1,CCT2,CCT5,DKC1,OBFC1,NEK2,PKIB,POT1
GO-BP	GO:1901998	toxin transport	15	1.74908	0.016649	CCT8,COPB2,CCT7,CCT4,HRH2,DNAJA1,CCT6A,TCP1,RAB28,CCT2,CCT5,NRP1,HSPA5,DNM1,SCFD1
GO-MF	GO:0003743	translation initiation factor activity	21	1.57611	0.0167664	EIF2B3,EIF2AK1,EIF3L,EIF2B2,EIF5,EIF3F,EIF3J,EIF3M,EIF4E2,EIF3I,DENR,EIF4G2,EIF3A,EIF1,EIF4A2,EIF3D,EIF2S3L,EIF2D,EIF2A,EIF1AY,EIF5B
GO-MF	GO:0019003	GDP binding	20	1.59203	0.0176813	DYNC1LI1,RAB18,RAB11B,RAB8A,RAN,RAB7A,RAB8B,GNAI1,RAB22A,RAP1B,RAB5A,RAB28,SRP54,RAB5C,RAB10,RAB14,RAB35,RAB21,RAB31,RAB9A
GO-CC	GO:0030173	integral component of Golgi membrane	22	1.54318	0.0184297	RFNG,SLC35B3,ACER3,ST3GAL2,ST6GAL1,SAMD8,SLC35B2,ST6GALNAC2,ENTPD4,STEAP2,ST3GAL6,ST8SIA1,FAM18B1,ST6GALNAC2L,SYS1,UBIAD1,ST8SIA4,QSOX2,RER1,SGMS1,ST8SIA2,ACER2
GO-CC	GO:0005815	microtubule organizing center	21	1.55721	0.019367	CCT8,CSNK1A1,YES1,KIF2A,RAB11B,C2CD5,NDC80,NUF2,KIF5B,BIRC6,NEK6,SPECC1L,PRKCZ,CDK1,DCAF12,DAB1,ODF2,IFT43,ALDOB,CASP8,PLA2G6
GO-MF	GO:0005515	protein binding	50	1.30042	0.0199711	GnRH-I,HBEGF,HSPA5,ETS1,SKI,CTCF,TLN1,CHRNB2,CHRNA3,CHRNA5,NUF2,TPM1,SRC,HDAC4,SOX9,KCNMA1,VCL,CHRNA4,NRP1,ITGB1,PXN,INCENP,CTTN,PTPN1,GRB2,HSPD1,SNAP25,CNTN1,PRDX1,LRP8,JUN,THRB,TGFBR2,HSPA2,ANXA5,LIN7C,MYB,ACTN2,ZYX,CENPH,NDC80,ASF1A,AFAP1,SOD1,CHAF1B,YWHAG,CENPS,CENPW,CTNNA2,CENPT
GO-MF	GO:0005524	ATP binding	386	1.08445	0.0208815	UBE2T,CAMK4,TLK2,STK38,MAP3K3,STRADA,DDX42,PAK1,MAP3K14,CDK18,DHX38,KARS,HSPA5,ATP8B3,,NEK6,PANK4,MYH10,MAP2K2,PRKCZ,CAMK1G,CLK3,CSNK1A1,CDK11A,UBE2G1,MAPK1,DDX20,ATP2A3,P2RX1,CAMKK1,DGKD,CDK12,ACSBG2,MAGI3,TEK,RARS,HIPK1,AARS,VCP,PFKFB4,KIF14,NEK7,LIG3,HSPA9,ULK1,RECQL5,CCT6A,RET,UBE4B,MYO1C,KIF1B,NME2,CDK1,ERBB4,DDX49,RAD54L2,TARS,ATAD5,DDX55,MTOR,EIF2AK1,PMS2,MAST3,DDX5,YARS,AK2,ATAD1,PAPSS2,M…
KEGG_PATHWAY	gga03022	Basal transcription factors	22	1.52251	0.0213304	CCNH,CDK7,TAF1,GTF2F2,TAF11,TBPL1,TAF3,MNAT1,TAF8,GTF2A2,GTF2IRD1,GTF2H3,GTF2H5,TAF4,TAF5,GTF2A1,TAF9,TAF13,TAF15,GTF2B,TAF12,GTF2I
GO-MF	GO:0004364	glutathione transferase activity	12	1.85425	0.0235262	GSTT1,GSTO1,LTC4SL,HPGDS,LTC4S,GSTK1,GSTA,GSTZ1,GDAP1L1,GSTA4,MGST1,GSTA3
GO-CC	GO:0005643	nuclear pore	16	1.66103	0.0239776	KPNA3,NUP93,KPNA4,NUP50,KPNA6,RANBP2,EIF5A2,MAD1L1,NUP107,NUP210,NUP58,XPOT,KPNA1,MAD2L1,KPNA2,KPNA5
GO-CC	GO:0032040	small-subunit processome	15	1.69262	0.0247403	RPS7,WDR3,UTP6,FCF1,UTP11,UTP14A,MPHOSPH10,NOP14,DIEXF,SNU13,UTP18,PDCD11,KRR1,UTP20,TBL3
KEGG_PATHWAY	gga00514	Other types of O-glycan biosynthesis	18	1.58933	0.0252373	POMT1,RFNG,ST6GAL2,ST6GAL1,B3GLCT,FUT4,B4GALT2,B4GALT3,EOGT,POMGNT1,POFUT1,OGT,B3GAT1,B4GALT1,GXYLT1,CHST10,POGLUT1,MGAT5B
GO-BP	GO:0006493	protein O-linked glycosylation	10	1.97332	0.0267441	POMT1,SGK196,B3GALNT2,ST8SIA6,PGM3,POMGNT2,POGLUT1,GALNT1,POMGNT1,EOGT
GO-BP	GO:0045732	positive regulation of protein catabolic process	16	1.6418	0.0267701	PLK2,RILP,IGF1,CUL4B,NKD1,GGA3,ASB9,RAB7A,MYLIP,TIPARP,OAZ1,CDKN1B,SORL1,FZR1,SOX9,ATG7
GO-BP	GO:0042177	negative regulation of protein catabolic process	12	1.81081	0.0283486	SNX12,FYN,RILP,SERPINE2,GRIN2A),AZIN2,NRG1,MDM4,MAD2L2,SNX3,MAD2L1,BANP
GO-BP	GO:0006749	glutathione metabolic process	13	1.75522	0.0283603	GSTT1,CTNS,GSTA,IDH1,GSTK1,GSTZ1,GSTA3,GSTO1,MMACHC,GPX1,MGST1,GDAP1L1,SOD1
GO-BP	GO:0032436	positive regulation of proteasomal ubiquitin-dependent protein catabolic process	23	1.47506	0.0286776	RFWD2,SUMO1,ARIH2,CSNK1A1,AURKA,SUMO2,USP5,PSEN1,RNF180,TRIB2,RACK1,ZFAND2A,CHFR,MDM2,GCLC,LRRK2,RNF138,DVL1,RNF144B,PSMD10,RNF144A,RNF166,AKT1
GO-MF	GO:0043022	ribosome binding	18	1.57611	0.0293617	RICTOR,EFL1,MTRF1,CPEB3,NAA15,MTOR,DENR,OLA1,MTRF1L,EIF5A2,GCN1,YTHDF1,ICT1,LETM1,SEC61A1,HSPA5,IMPACT,EIF2A
GO-CC	GO:0005759	mitochondrial matrix	30	1.39037	0.0294756	PRIMPOL,DLAT,ISCA1,BDH1,MIPEP,TRMT5,TFB2M,MTERF2,NDUFA10,GLRX5,BCL2L1,TYMS,SUPV3L1,TMLHE,RPS3,AK4,ALAS1,PITRM1,FDX1,HMGCL,LRRK2,CLPX,SUCLG1,EARS2,TIMM44,ACO2,HSPD1,GOT2,IARS2,ADPRHL2
GO-MF	GO:0003682	chromatin binding	95	1.1827	0.029827	TRIM37,TFAM,PRIMPOL,ARID3A,ATF2,NCAPD3,PRKAA1,HMGN1,NOC2L,DNAJC2,NEUROD1,POLA1,SKI,APITD1,SSRP1,SFPQ,HP1BP3,RNF20,BRD2,EXO1,TOP2A,TDRD3,ZMYND11,PHF13,RNF8,HMGN3,ATRX,ADNP,ESR1,REL,DDX1,LDB1,WHSC1,ANKRD2,RBMX,MCM3,JUN,HDAC4,SREBF1,NELFA,SIN3A,SOX9,ASF1A,PRKAA2,CITED2,POLR2B,BCAS3,MED1,MCMBP,GPER1,NCOA1,SSBP1,SKIL,IFT74,MBD5,TOP2B,UBE2T,POLR3A,APTX,MSH6,KDM8,HDAC3,SMC3,ACTL6A,PSIP1,GLI2,HINFP,CCNT2…
GO-MF	GO:0004722	protein serine/threonine phosphatase activity	16	1.61652	0.0329394	MTMR3,PPM1L,PPP2R2A,CDKN3,PPP1CC,PPM1K,PPM1G,PPTC7,CDC14B,PPA2,CDC14A,PDP2,ILKAP,UBLCP1,PPM1J,PPP6C
GO-BP	GO:0006325	chromatin organization	6	2.56532	0.0363676	HMGN1,NUP133,HDAC3,HDAC1,HDAC4,HDAC2
GO-BP	GO:1904871	positive regulation of protein localization to Cajal body	6	2.56532	0.0363676	CCT8,TCP1,CCT2,CCT4,CCT7,CCT5
GO-MF	GO:0003684	damaged DNA binding	20	1.50106	0.0370043	RAD23B,CUL4B,HMGB2,XRCC5,MSH2,POLH,GTF2H3,XRCC6,APTX,MSH6,RPA1,XPA,EP300,RPA3,DCLRE1C,CREBBP,DCLRE1A,RPS3,NEIL1,REV1
GO-BP	GO:0006486	protein glycosylation	28	1.38132	0.0389921	POMT1,ST3GAL2,GALNT16,RPN2,RPN1,ST6GALNAC2,ST3GAL6,ST8SIA1,DDOST,B3GNT9,GALNT9,ST8SIA4,B3GALT2,COG7,ST6GAL2,ST6GAL1,FUT4,FUT11,PSEN1,B3GALT6,GBGT1,B3GALT1,ALG1,GALNT15,UGGT2,ST6GALNAC4,ST8SIA6,ST8SIA2
GO-BP	GO:0042060	wound healing	17	1.55751	0.039019	CDH7,PPARD,FGFR1OP2,SLC11A1,TGFB2,CNN2,FGF2,C26H6ORF89,CCM2L,DCBLD2,SDC1,PTK7,PAK1,GRHL3,NF1,FN1,PDGFRA
GO-MF	GO:0031625	ubiquitin protein ligase binding	31	1.3572	0.0390314	SMAD5,SUMO1,UBE2G2,SPOPL,UBE2A,NPLOC4,UBE2J1,ABTB2,USP13,BTBD3,UBE2F,UBE2J2,UBE2T,UBE2V2,VCL,CKB,ANAPC2,HSPA5,BTBD9,PRKAR1A,UBE2V1,YWHAE,HSPA2,CUL4B,BTBD1,UBE2G1,CDC34,KLHL11,HSPD1,MPHOSPH8,CUL5
GO-BP	GO:0043066	negative regulation of apoptotic process	75	1.19502	0.0405519	TFAP2B,AVEN,NAA35,IGF1,PDCD10,PTGFR,CASP3,PRKAA1,TNFRSF18,NAA15,TMF1,AATF,NPM1,GHRL,RPS3A,MRE11A,GRK5,HIPK3,ASNS,TOR4A,ARHGAP10,MAD2L1,ADAMTS20,PCID2,WT1,ATG5,ACTC1,ANKRD1,SOX8,MAPK8,RHBDD1,MDM2,WNT7A,ERBB4,CDKN1B,LTK,NME2,SIN3A,MAEA,PRKAA2,CITED2,ED1,DNAJA1,FKBP8,PRNP,SOCS3,MDM4,HSPA5,SUPV3L1,BIRC2,GLI2,FHL2,CBL,PLK2,IL2RB,RARB,AURKA,PSMG2,CIB1,MYDGF,PIM3,BCL6,STAT5B,COMP,NR1H4,PLK3,BARD1,GLO1,D…
GO-CC	GO:0031080	nuclear pore outer ring	7	2.27094	0.041188	NUP107,NUP133,SEC13,NUP43,NUP85,AHCTF1,NUP37
GO-BP	GO:0007409	axonogenesis	27	1.38527	0.0414731	BRSK2,NTNG2,SLITRK4,LRFN2,CREB1,AFG3L2,RAB8A,RTN4R,TNN,TOP2B,SLITRK1,SMN,DOCK7,SLITRK5,LRRC55,CTNNA2,LRTM2,ECM2,SPAST,PTPN11,PAK3,NUMB,OMG,LUM,RAB10,OGN,PAK1
GO-MF	GO:0008574	ATP-dependent microtubule motor activity, plus-end-directed	8	2.10148	0.0415815	KIF5B,KIF26A,KIF16B,KIF18A,KIF26B,KIF5C,KIF14,KIF4A
GO-CC	GO:0005768	endosome	51	1.24871	0.0420665	RASSF9,FYN,STEAP1,SNX3,ASTN1,VPS26A,BET1L,ARRDC3,COMMD1,SCOC,EZR,DSCR3,STEAP3,VPS29,TGFB2,STEAP2,BIRC6,RAB10,SNX7,SNX5,CLVS2,SNX8,TJAP1,ATP6V0B,RABEP1,ANXA1,APP,BDKRB2,STARD3,TNFAIP1,ARF6,SPAST,SNX12,CLCN3,GRB2,SNX6,NSG1,ASTN2,VPS26B,RHOA,RAB11FIP2,CTSE,AP1AR,SNX10,SNX4,LEPROT,LRP2,PACSIN1,SNX30,KCNK1,TMEM175
GO-MF	GO:0004003	ATP-dependent DNA helicase activity	10	1.87632	0.0422857	BRIP1,MRE11A,XRCC6,RUVBL1,RTEL1,XRCC5,MCM4,FBXO18,DDX11,RAD50
GO-MF	GO:0017056	structural constituent of nuclear pore	9	1.97014	0.0425129	NUP93,NUP107,NUP155,NUP153,NUP133,NUP205,NUP85,NUP62,NUP54
GO-BP	GO:0060213	positive regulation of nuclear-transcribed mRNA poly(A) tail shortening	7	2.24465	0.0436555	TNRC6C,BTG2,TNRC6B,CNOT1,CPEB3,TOB1,CNOT7
GO-BP	GO:0006614	SRP-dependent cotranslational protein targeting to membrane	7	2.24465	0.0436555	SRP72,SRP14,SRP54,SRP68,SEC63,SSR3,SEC61A1
GO-BP	GO:0061136	regulation of proteasomal protein catabolic process	7	2.24465	0.0436555	BTRC,PSME3,RHBDF1,GPX1,PSMD14,DYX1C1,TMF1
GO-BP	GO:0090307	mitotic spindle assembly	14	1.63247	0.0444961	TPX2,ZNF207,MYBL2,PIBF1,MZT1,KIF2A,TUBGCP2,RAB11A,RHOA,TUBGCP3,TUBGCP4,NEK2,BIRC2,WRAP73
GO-BP	GO:0007067	mitotic nuclear division	30	1.35017	0.0446485	CSNK1A1,NUDC,USP16,USP37,KIF2A,KLHL13,MCMBP,ARPP19,WEE1,PPP1R12A,APITD1,MIS12,MASTL,CENPW,CENPT,SEPT2L,NUSAP1,SETDB2,CENPN,TIPIN,CCNA2,NUF2,CEP63,INCENP,RECQL5,CCNB2,CDK1,ITGB3BP,MAD2L2,MAPRE1
GO-CC	GO:0034451	centriolar satellite	11	1.78431	0.0449933	SSX2IP,PCNT,PIBF1,SDCCAG8,CEP131,BBS4,PCM1,CCDC13,CEP290,ALDOB,HOOK3
KEGG_PATHWAY	gga00240	Pyrimidine metabolism	44	1.26591	0.0452321	NT5C1A,NT5E,RRM1,POLR2B,DTYMK,NME7,POLR2F,POLR3F,NME4,NT5C3B,POLR2D,CANT1,POLA1,NUDT2,TWISTNB,POLR3A,CTPS2,UMPS,DHODH,POLR3B,TYMS,PRIM2,CMPK1,TK1,DGUOK,POLR2L,NME1,ENTPD8L,CDA,POLD3,POLE2,ENTPD1,ENTPD4,POLR3E,POLE3,POLR2C,CAD,POLR3G,AK9,POLR1D,RRM2,DCTD,ENTPD5,NME2
GO-MF	GO:0003755	peptidyl-prolyl cis-trans isomerase activity	17	1.53988	0.0453966	FKBP4,PPIC,PPID,FKBP10,FKBP14,CWC27,PPIL3,FKBP1B,RANBP2,PPIF,FKBP1A,FKBP8,PPWD1,PPIH,PIN4,PPIG,FKBP3
GO-BP	GO:0042384	cilium assembly	40	1.28266	0.0469907	CEP83,SSX2IP,RFX3,PCNT,TTC26,EXOC5,ARL6,RAB8A,IFT74,WDR35,CEP162,SEPT2,YNC2LI1,EHD3,IFT140,ATP6V1D,TTC30A,KIF24,FBF1,PCM1,SEPT2L,IQCB1,IFT80,CBY1,KIF27,BBS5,OCRL,ABCC4,DZIP1,TTBK2,NEK1,SNX10,ICK,TRIM59,RPGRIP1L,CDC14A,RFX4,ACTR2,LAMA5,STK36
GO-BP	GO:0000460	maturation of 5.8S rRNA	8	2.05225	0.0474041	EXOSC10,NSA2,C1D,RRP15,WDR37,RPF1,MAK16,WDR12
GO-BP	GO:0000028	ribosomal small subunit assembly	8	2.05225	0.0474041	RPS15,RRP7A,MRPS7,RPS28,RPS14,MRPS11,RPS17,RPS10
GO-BP	GO:0030705	cytoskeleton-dependent intracellular transport	8	2.05225	0.0474041	KIF13A,KIF5B,KIF26A,KIF16B,KIF1B,KIF26B,KIF5C,KIF14
GO-BP	GO:0009142	nucleoside triphosphate biosynthetic process	8	2.05225	0.0474041	AK1,SUCLG1,AK7,NME4,CMPK1,NME2,NME1,AK4
GO-BP	GO:0032981	mitochondrial respiratory chain complex I assembly	8	2.05225	0.0474041	NDUFAF5,NDUFS7,NDUFAF4,BCS1L,NDUFAF7,NDUFS5,ACAD9,TIMM21
GO-BP	GO:0032147	activation of protein kinase activity	12	1.71021	0.0476085	TPX2,PPP2R3C,STRADA,TGFBR2,ECT2,CLSPN,DLG1,SLC11A1,EMP2,TGFB2,KIF14,ACVR2B
GO-BP	GO:0051297	centrosome organization	11	1.76366	0.0487184	HAUS8,SSX2IP,SDCCAG8,BBS4,SLC16A1,FES,HAUS2,PCM1,PPP1R12A,HAUS6,XRCC2
GO-BP	GO:0060047	heart contraction	9	1.92399	0.0490127	SGCG,CDC42,DNM1L,ATG5,ACTC1,GPX1,SGCZ,SGCD,SOD1
GO-BP	GO:0071364	cellular response to epidermal growth factor stimulus	9	1.92399	0.0490127	BAG4,MED1,ZPR1,EEF1A1,PDPK1,GAREM1,SOX9,AKT1,INPP5K
GO-BP	GO:0001731	formation of translation preinitiation complex	10	1.83237	0.0492884	EIF3A,EIF3L,EIF3F,EIF3J,MCTS1,EIF3M,EIF2D,EIF2S3L,EIF3I,DENR
GO-BP	GO:0046034	ATP metabolic process	10	1.83237	0.0492884	AK2,CTNS,AK1,HSPA2,NDUFAF7,HSPA8,HSPA5,ENTPD5,AK4,OLA1
